# Supplementary material
Source: MDPI journal article supplement (https://www.mdpi.com/2297-8739/9/11/333)
Supplement: s1 [file s1]

# Ultrahigh sensitivity capillary electrophoresis analysis of trace amounts of nitrate and nitrite in environmental water samples

Robert Farsang<sup>1</sup>, Zsolia Kovacs<sup>2</sup>, Gabor Jarvas<sup>1</sup>, and Andras Guttman<sup>1,3,4,\*</sup>

<sup>1</sup> Translational Glycomics Group, Research Institute of Biomolecular and Chemical Engineering, University of Pannonia, Veszprem, Hungary; farsang.robert@mk.uni-pannon.hu (Robert Farsang), jarvas.gabor@mk.uni-pannon.hu (Gabor Jarvas)

<sup>2</sup> Sustainability Solutions Research Lab, Research Centre for Biochemical, Environmental and Chemical Engineering, University of Pannonia, Veszprem, Hungary; kovacs.zsolia@mk.uni-pannon.hu

<sup>3</sup> Horváth Csaba Memorial Laboratory of Bioseparation Sciences, University of Debrecen, Hungary

<sup>4</sup> Department of Chemistry, Seoul National University, Seoul, Republic of Korea

\* Correspondence: andrasguttman@gmail.com

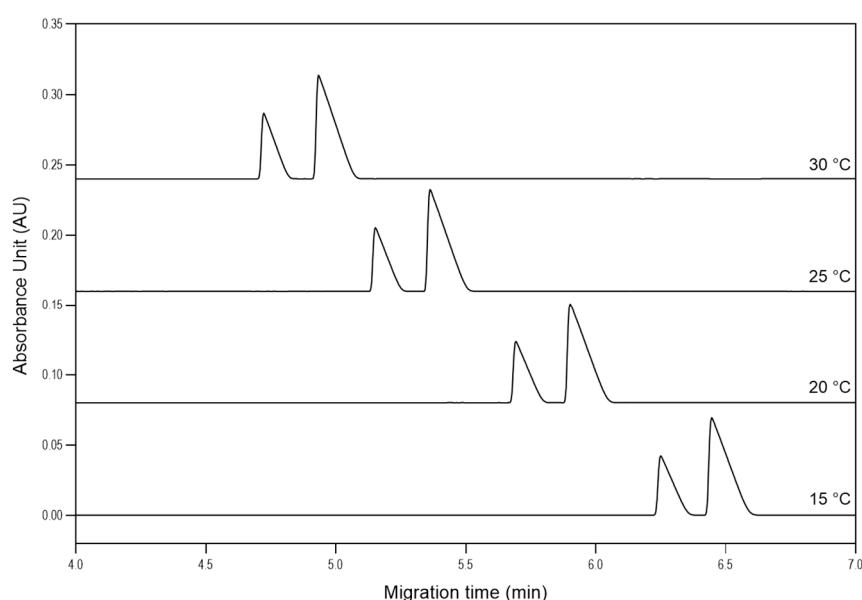

Figure S1. The effect of separation temperature on the peak resolution and migration time. Separation conditions: 50  $\mu\text{m}$  I.D., 375  $\mu\text{m}$  O.D., 60 cm total and 50 cm effective length BFS capillary; 75 mM TRIS-HCl BGE; hydrodynamic injection (8 psi / 8 seconds); 30 °C capillary temperature; 200 nm detection wavelength; -30 kV (reverse polarity, anode at the injection side) separation voltage with 1 minute ramp-up time.

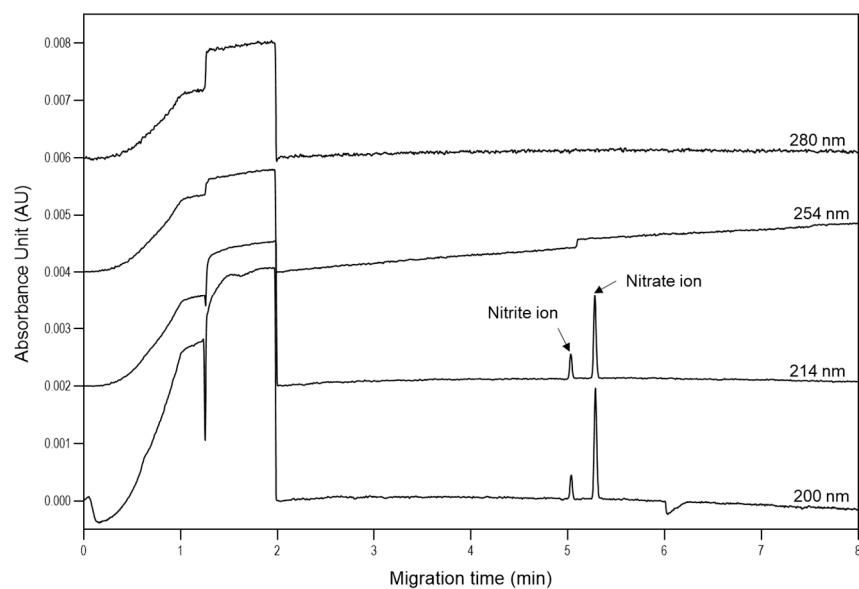

Figure S2. Detection of nitrite and nitrate at different wavelengths. Separation conditions: same as in S1.

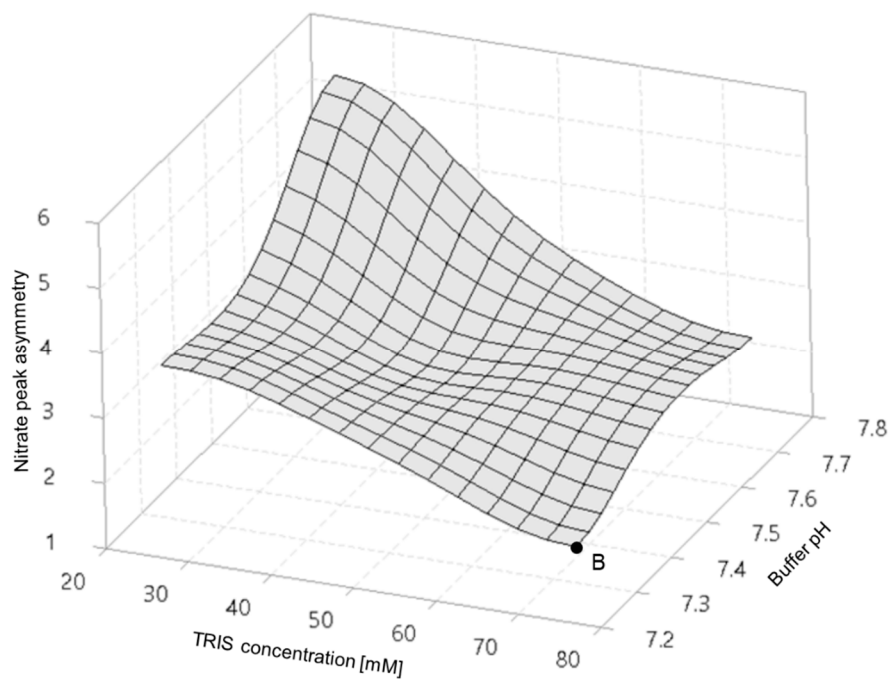

Figure S3. Nitrate peak asymmetry in the function of TRIS concentration and pH of the separation buffer. Point B denotes the parameter combination resulted in the most symmetric peak. Separation conditions: same as in S1 except noted else.

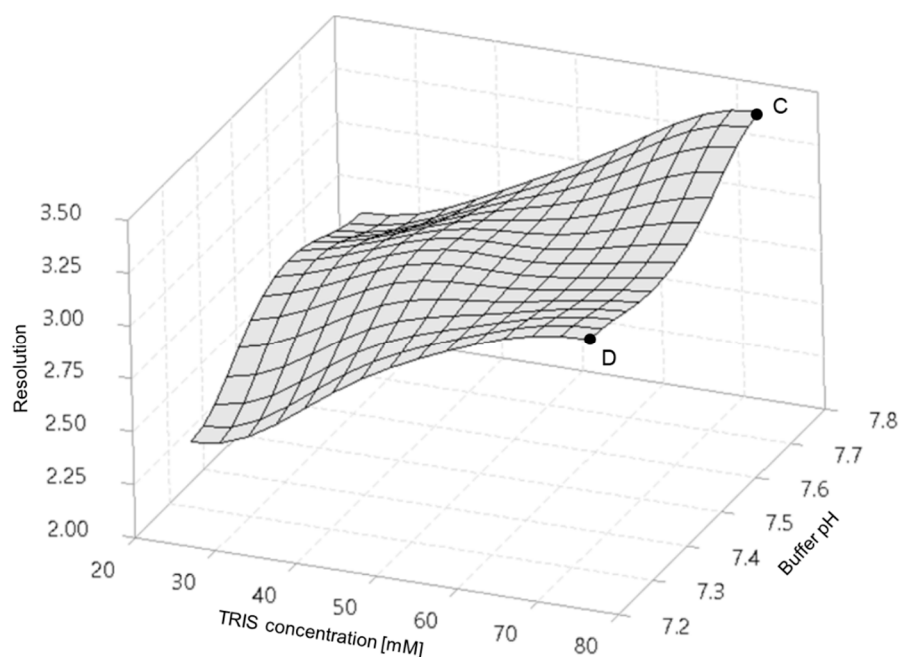

Figure S4. Nitrate and nitrite peak resolution in the function of TRIS concentration and pH of the separation buffer. Point C denotes the highest resolution, however, resolution of point D is also satisfactory. Considering the findings of Figure 1, S2 and S3, 75 mM TRIS-HCl BGE at pH = 7.25 was chosen. Separation conditions: same as in S1 except noted else.

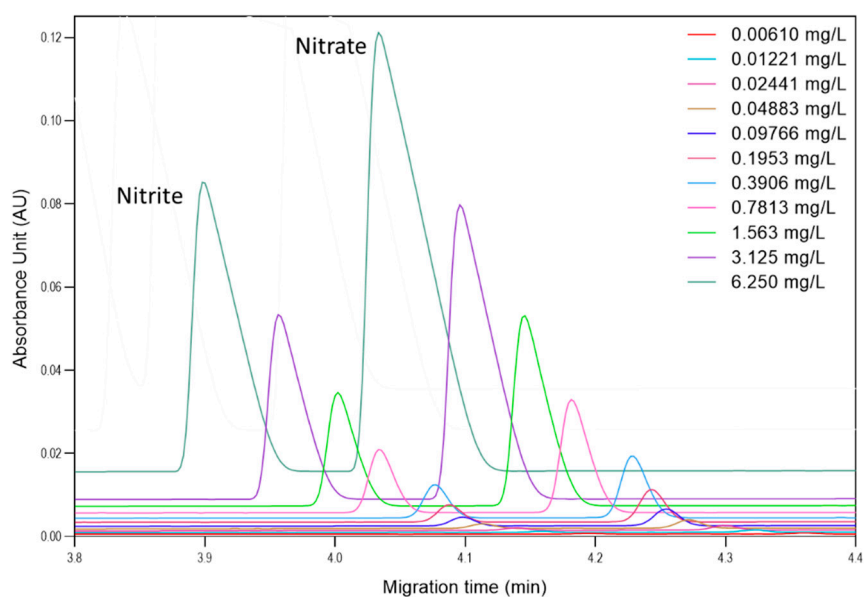

Figure S5. Separate nitrate and nitrite CE runs used for the setup of the calibration functions. Separation conditions: same as in S1 except noted else.

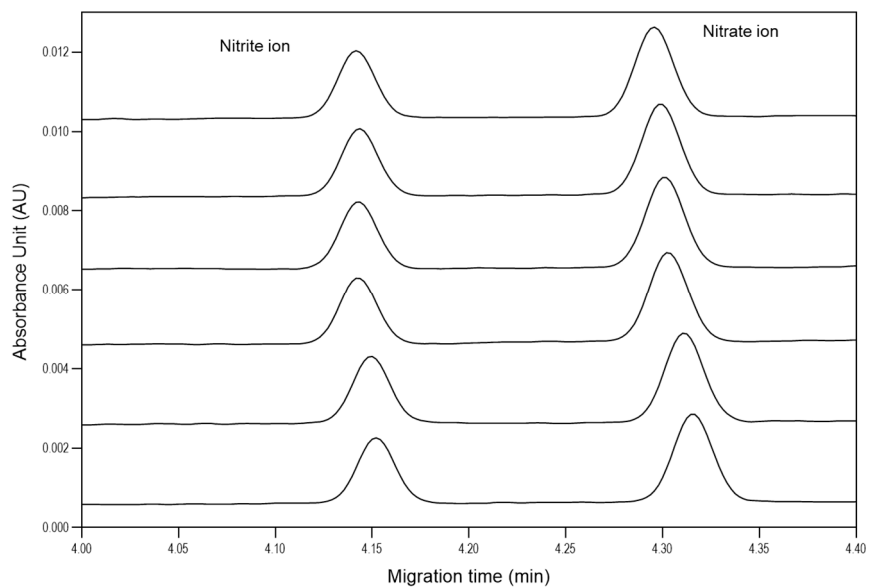

Figure S6. Electropherograms of the repeated separations for the reproducibility test. Separation conditions: identical as in SI.

Table SI. Statistical evaluation of the repeated ( $n = 6$ ) separations for the reproducibility test.

| Compound        | Peak area |      |      |      |      |      | Mean | Variation | RSD% |
|-----------------|-----------|------|------|------|------|------|------|-----------|------|
| $\text{NO}_2^-$ | 2439      | 2409 | 2364 | 2388 | 2423 | 2472 | 2416 | 38.408    | 1.58 |
| $\text{NO}_3^-$ | 3244      | 3336 | 3352 | 3314 | 3280 | 3274 | 3300 | 41.01     | 1.24 |
