# Supplementary material
Source: MDPI journal article supplement (https://www.mdpi.com/2297-8739/9/11/333)
Supplement: s1 [file s1]

Archive with 1 entries (1 files):
- separations-1974855-supplementary.pdf
